# Supplementary material for: A unique 2.1 V “Water in Salt” elemental sulfur based Na-ion hybrid storage capacitor
Source: Royal Society of Chemistry journal article supplement (doi:10.1039/d1ta10940e), 2022-01-01
Supplement: d1ta10940e1.pdf [file d1ta10940e1.pdf]

## Supporting Information

### A unique 2.1 V “water in salt” elemental sulfur based Na-ion hybrid storage capacitor

Mukesh Kumar and Tharamani C. Nagaiah\*

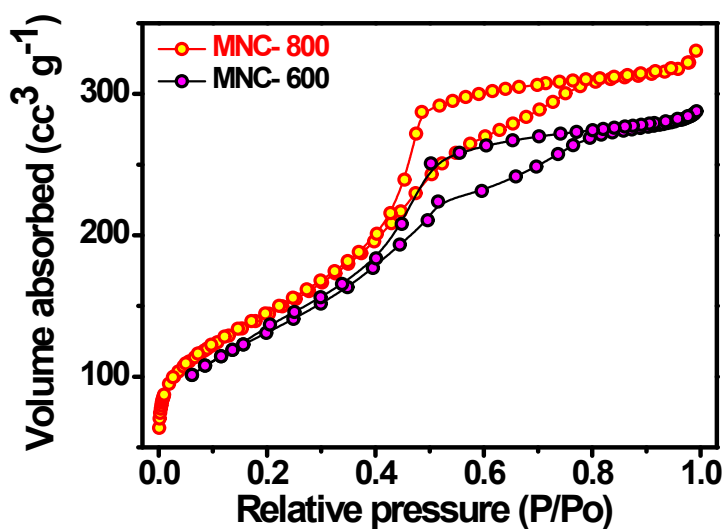

**Fig. S1.** Nitrogen physisorption isotherms of the MNC-600 and MNC-800 catalyst.

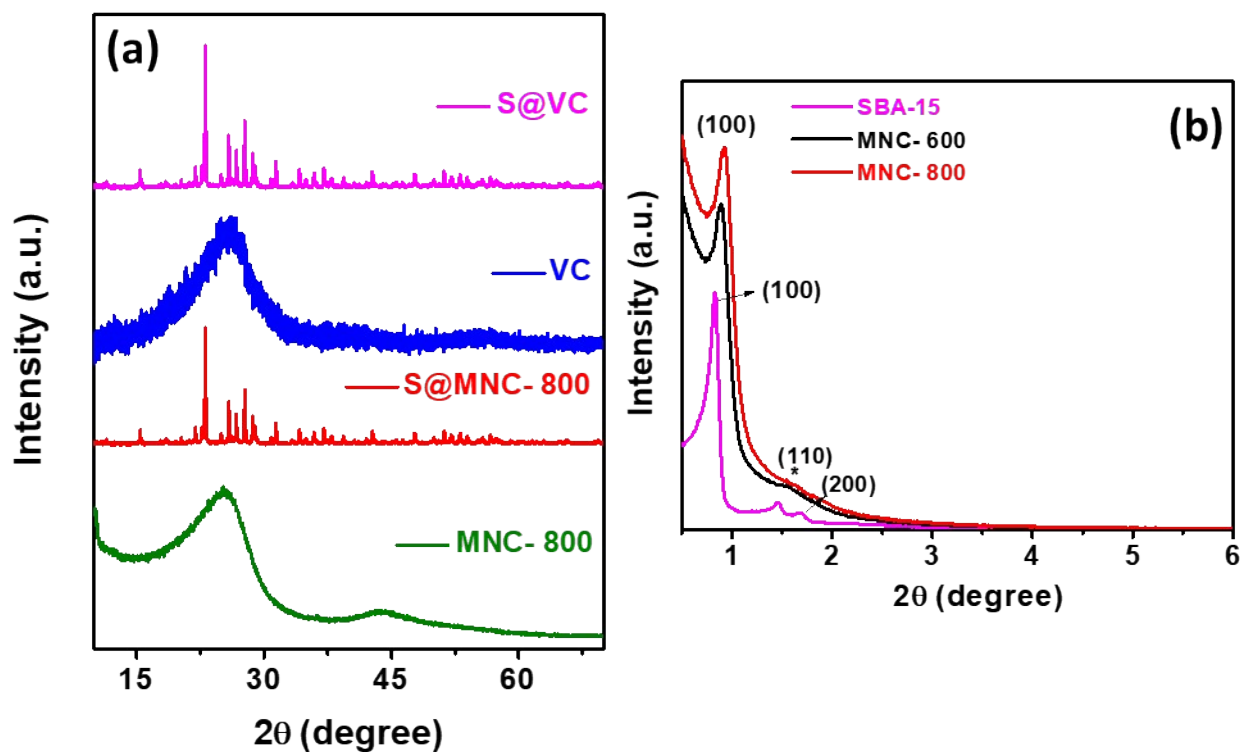

**Fig. S2.** (a) XRD pattern of VC and MNC-800 before and after incorporating S and (b) small angle XRD pattern of SBA-15, MNC-600, and MNC-800.

### Thermogravimetric analysis (TGA):

The thermogravimetric analysis (TGA) was performed in the N<sub>2</sub> atmosphere using alumina pan using “TGA/DSC1” instrument from Mettler Toledo with SDTA sensor, and data were analyzed in STAR<sup>e</sup> software (version 12.1). Thermal stability was investigated by heating from 30 °C to 800 °C at a heating rate of 10 °C/min at 40 mL/min N<sub>2</sub> (99.999%) flow. Each sample was tested for at least three times, and the error limit is <2%.

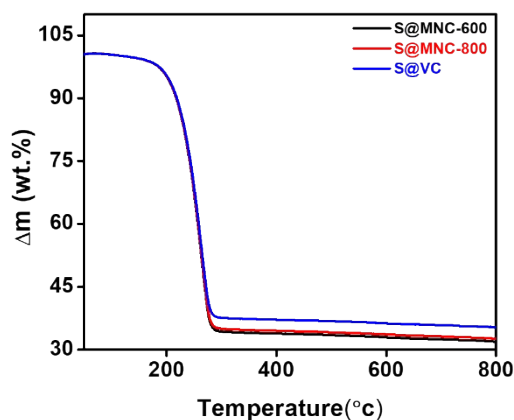

**Fig. S3.** (a) TGA of S@MNC-600, S@MNC-800 and S@VC.

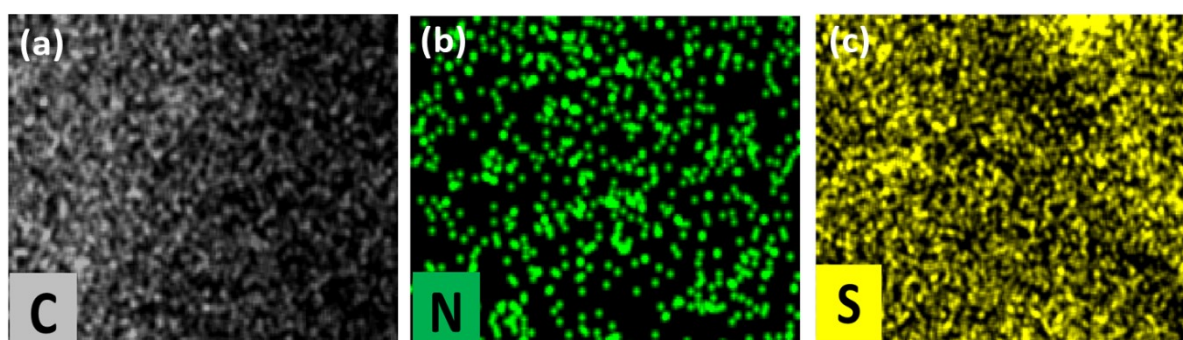

**Fig. S4.** elemental dot mapping images of (a) carbon, (b) nitrogen, and (c) sulfur.

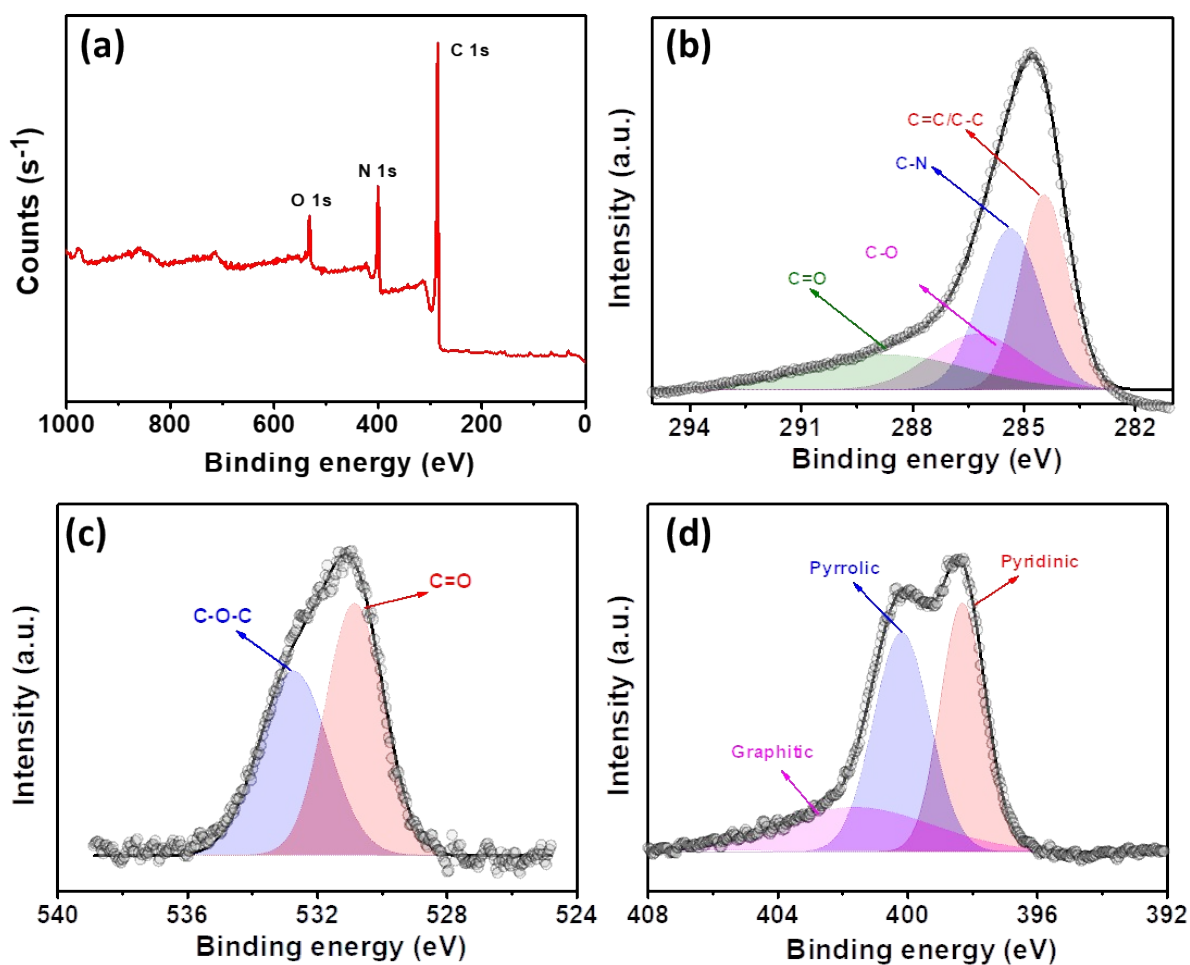

**Fig. S5.** (a) XPS survey spectrum and deconvoluted XP spectra of (b) C 1s, (c) O 1s, and (d) N 1s of MNC-600.

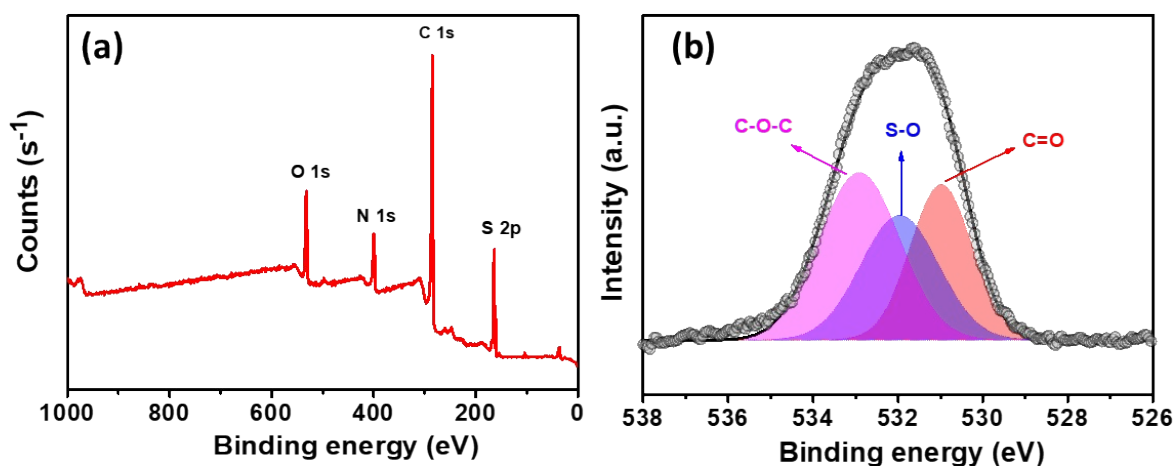

**Fig. S6.** (a) XPS survey spectrum and deconvoluted XP spectra of (b) O 1s, of S@MNC-600.

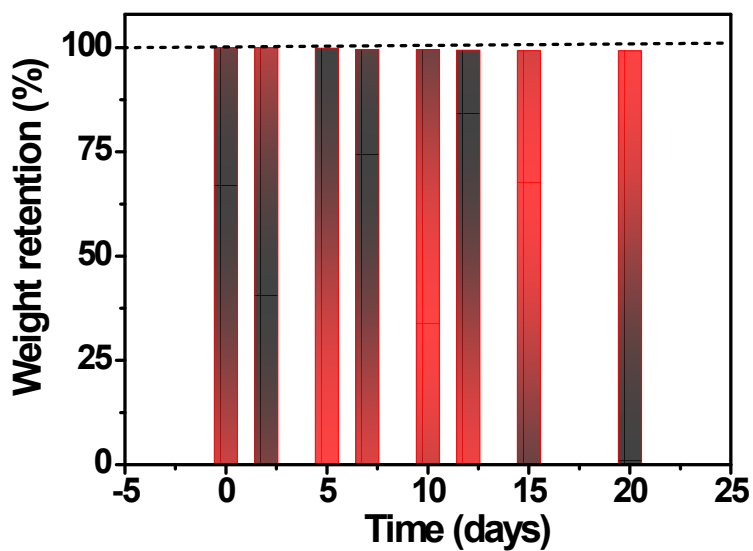

**Fig. S7.** Bar diagram representing the weight retention of the electrolyte at room temperature upto 20 days of analysis..

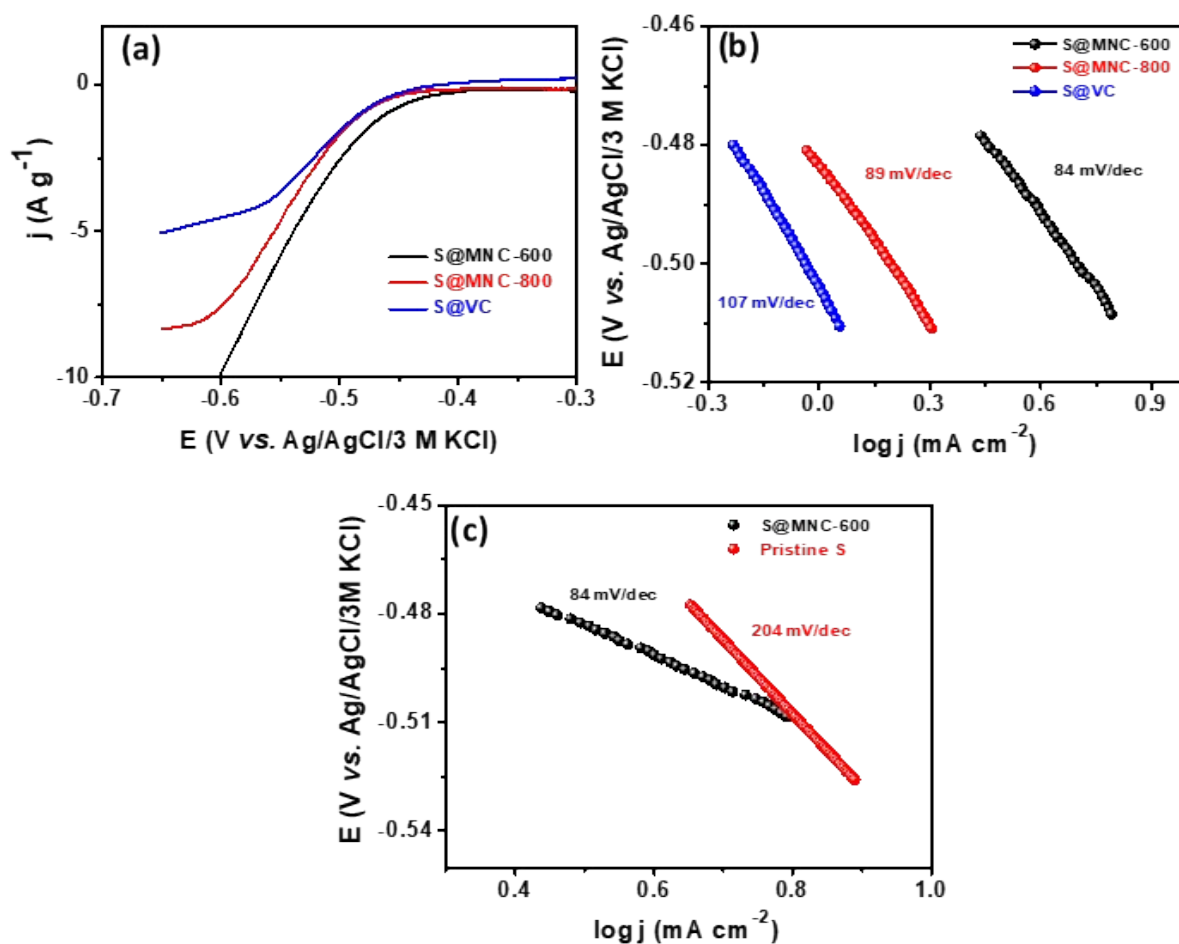

**Fig. S8.** Linear polarisation curve (zoomed part of CV fig. 2 a) representing the onset potential, (b) and (c) are the corresponding Tafel plot for reduction of elemental sulfur to sodium polysulfide CE: Pt wire, RE: Ag/AgCl/3 M KCl.

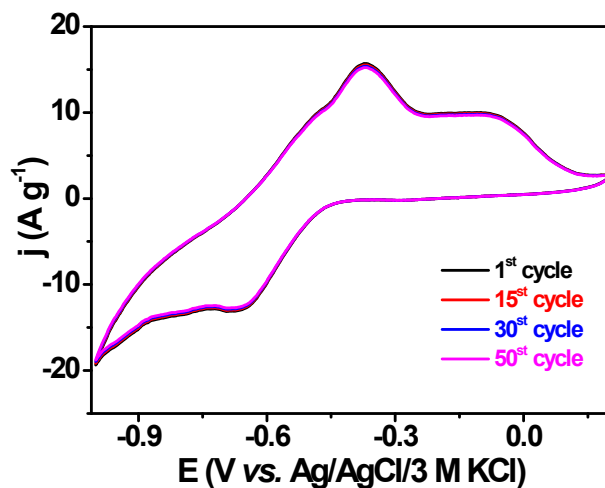

**Fig. S9.** Cyclic voltammograms of S@MNC-600 at 30 mV s<sup>-1</sup> during stability study in 17 m aq. NaClO<sub>4</sub> electrolyte, CE: Pt wire, RE: Ag/AgCl/3 M KCl.

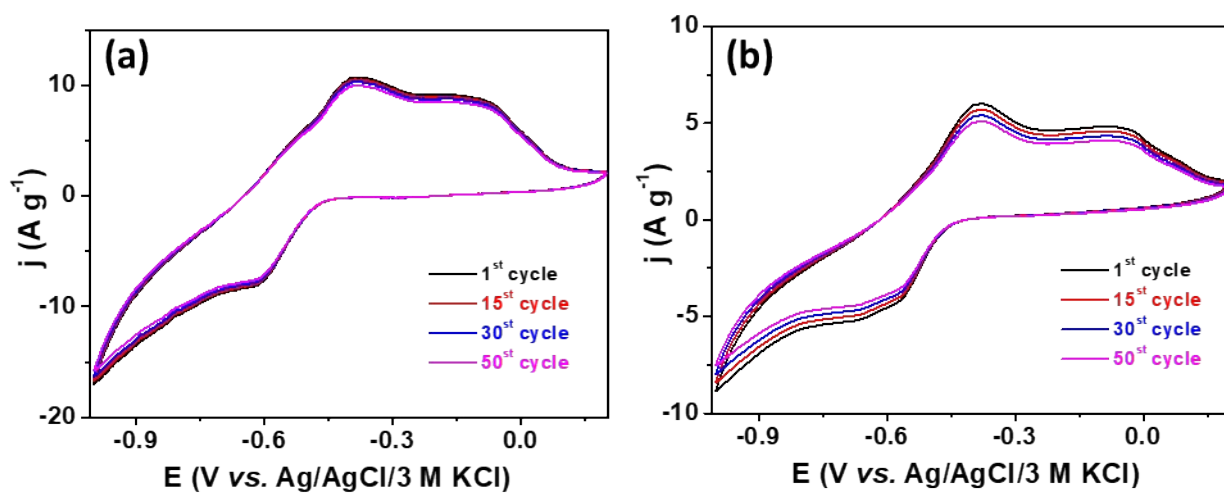

**Fig. S10.** Cyclic voltammograms of (a) S@MNC-800 and (b) S@VC at 30 mV s<sup>-1</sup> during stability study in 17 m aq. NaClO<sub>4</sub> electrolyte, CE: Pt wire, RE: Ag/AgCl/3 M KCl.

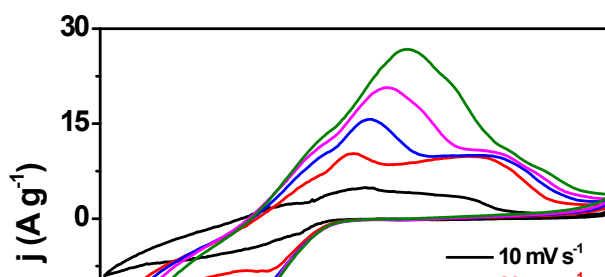

**Fig. S11.** Cyclic voltammograms of S@MNC-600 at various scan rates in 17 m aq. NaClO<sub>4</sub> electrolyte, CE: Pt wire, RE: Ag/AgCl/3 M KCl.

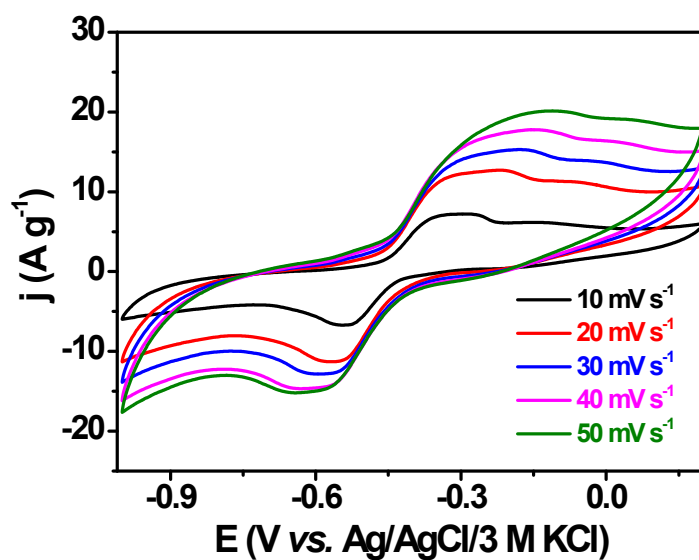

**Fig. S12.** Cyclic voltammograms of S@MNC-600 at various scan rates in 1 m aq. NaClO<sub>4</sub> electrolyte, CE: Pt wire, RE: Ag/AgCl/3 M KCl

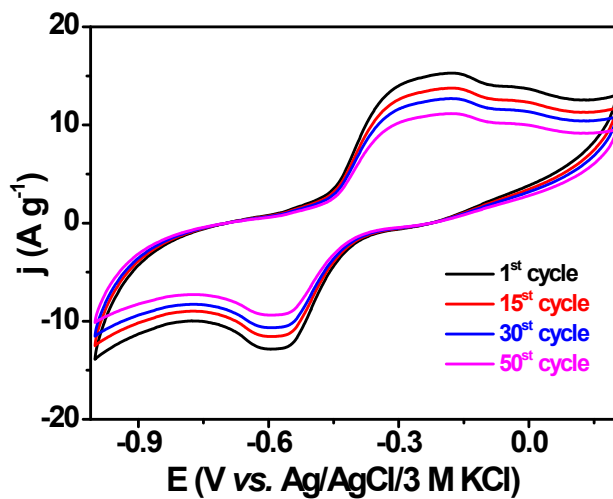

**Fig. S13.** Cyclic voltammograms of S@MNC-600 at  $30 \text{ mV s}^{-1}$  during stability study in  $1 \text{ m aq. NaClO}_4$  electrolyte, CE: Pt wire, RE: Ag/AgCl/3 M KCl.

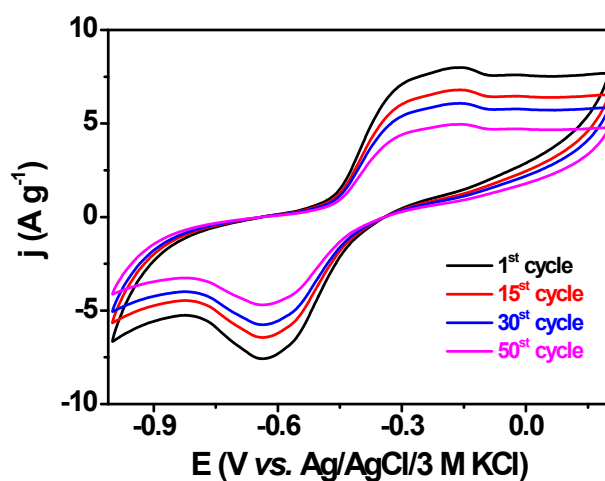

**Fig. S14.** Cyclic voltammograms of S@VC at  $30 \text{ mV s}^{-1}$  during stability study in  $1 \text{ m aq. NaClO}_4$  electrolyte, CE: Pt wire, RE: Ag/AgCl/3 M KCl.

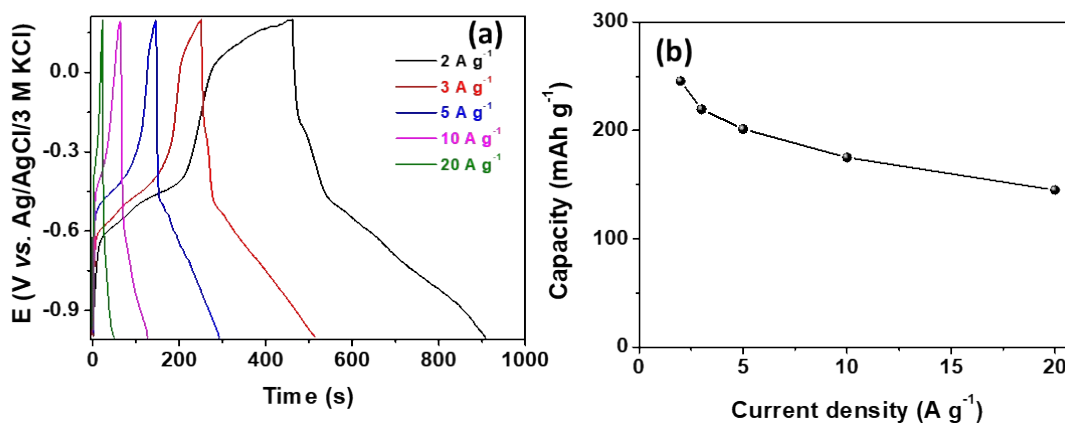

**Fig. S15.** GCD curves for S@MNC-800 at various current densities, and (b) corresponding capacity vs. current density plot in  $17 \text{ m NaClO}_4$  CE: Pt wire, RE: Ag/AgCl/3 M KCl.



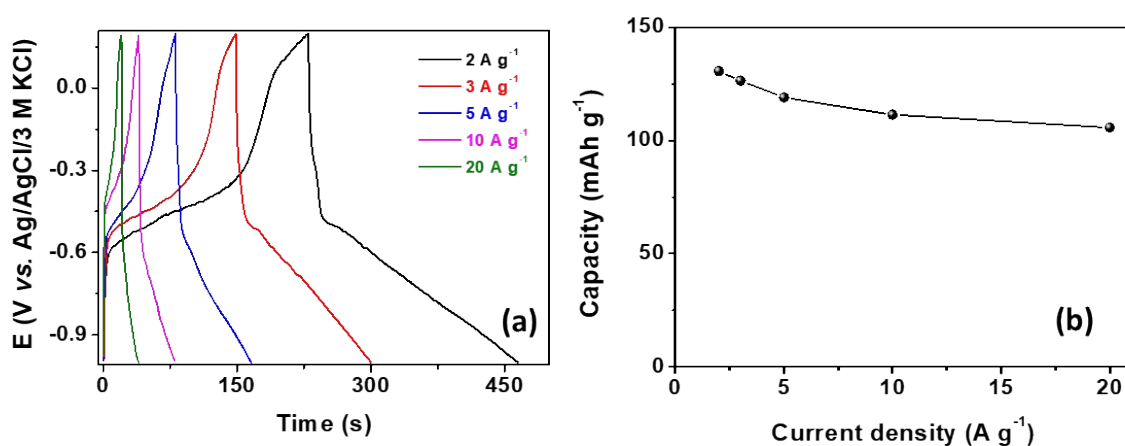

**Fig. S16.** GCD curves for S@VC at various current densities, (b) and (c) are the corresponding capacitance vs. current density and capacity vs. current density plot in 17 m NaClO<sub>4</sub> CE: Pt wire, RE: Ag/AgCl/3 M KCl.

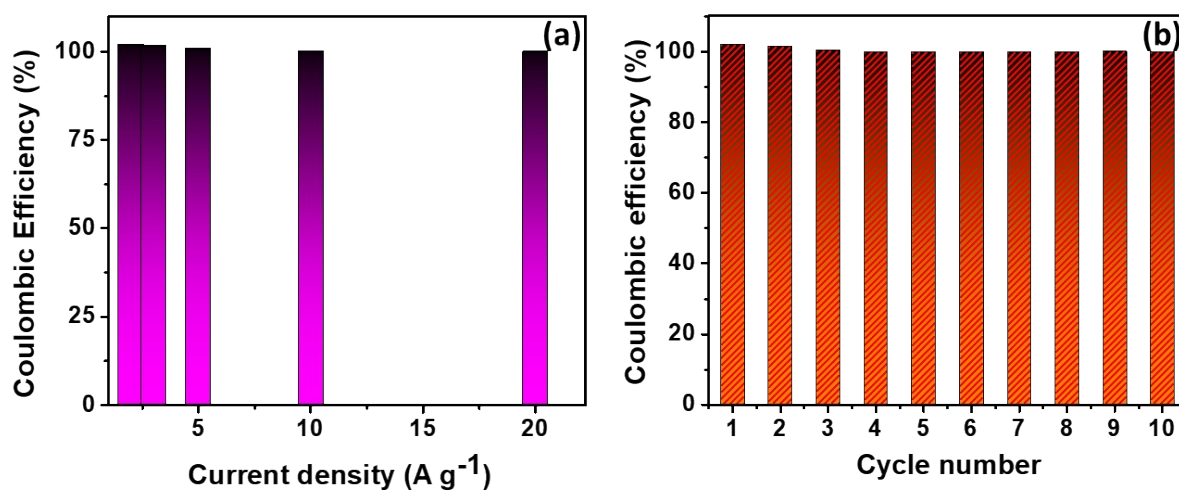

**Fig. S17** Bar diagram representing the CE for S@MNC-600 negative electrode at various current densities, (b) bar diagram illustrating the CE for S@MNC-600 negative electrode at 2 A g<sup>-1</sup> up to 10 consecutive cycles in 17 m NaClO<sub>4</sub>.

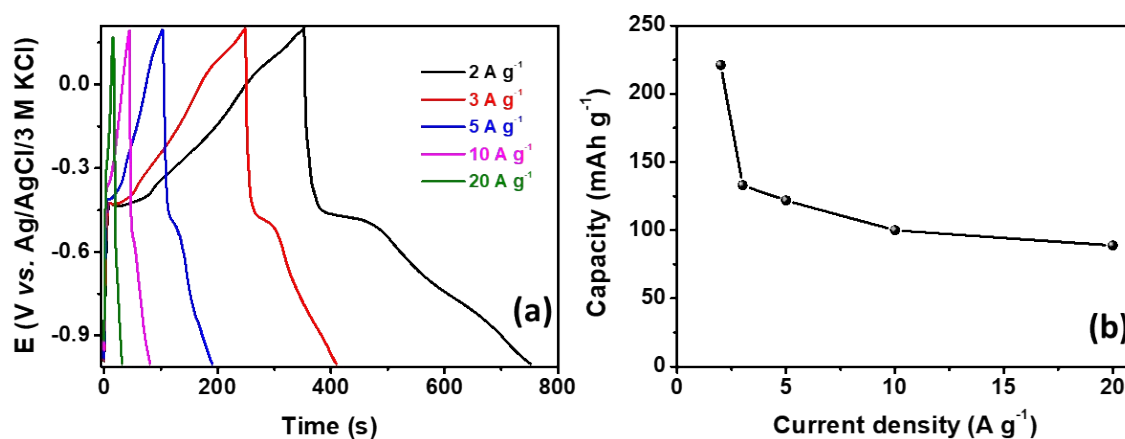

**Fig. S18.** GCD curves for S@MNC-600 at various current densities, (b) and (c) are the corresponding capacitance *vs.* current density and capacity *vs.* current density plot in 1 m NaClO<sub>4</sub> CE: Pt wire, RE: Ag/AgCl/3 M KCl.

**Table S1:** Showing the maximum solubility of various sodium salts.<sup>1</sup>

| Salt                            | Maximum conc. (m) |
|---------------------------------|-------------------|
| NaCl                            | 6                 |
| CH <sub>3</sub> COONa           | 6                 |
| Na <sub>2</sub> SO <sub>4</sub> | 2                 |
| NaNO <sub>3</sub>               | 10.7              |
| NaClO <sub>4</sub>              | 17                |

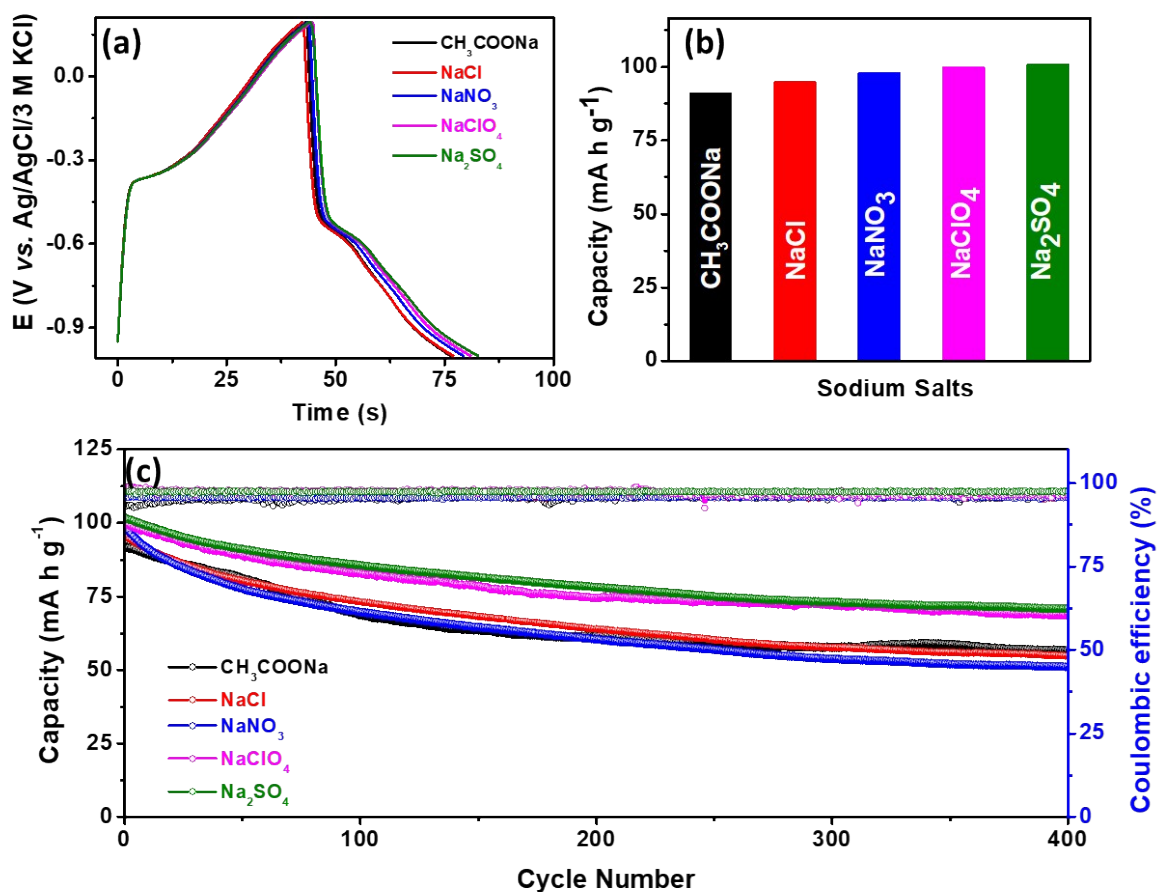

**Fig. S19** (a) Charge discharge curves, (b) corresponding capacity for S@MNC-600 in various sodium salts @ 10 A g<sup>-1</sup>, and (c) cycling stability of S@MNC-600 up to 400 cycles at 20 A g<sup>-1</sup> in 17 m NaClO<sub>4</sub>.

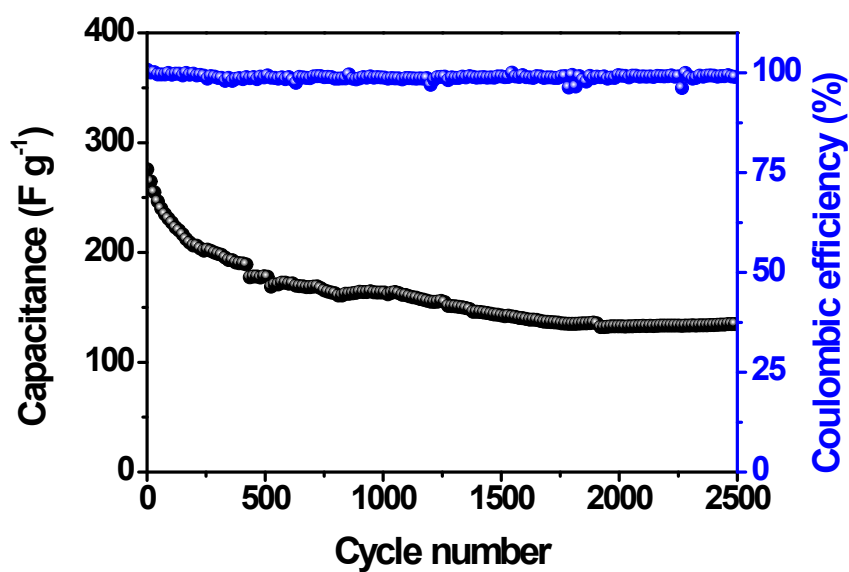

**Fig. S20.** Cycling stability of S@MNC-600 up to 2500 cycles at  $20 \text{ A g}^{-1}$  in  $1 \text{ m NaClO}_4$  CE: Pt wire, RE: Ag/AgCl/3 M KCl.

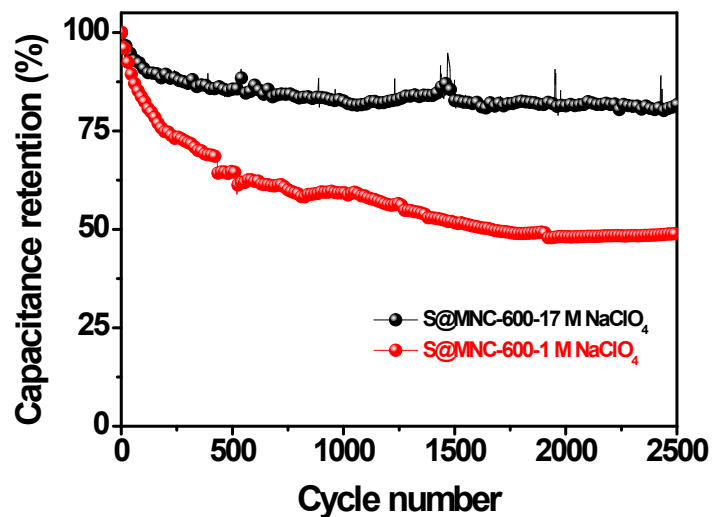

**Fig. S21.** Comparisons of capacitance retention of S@MNC-600 in  $1 \text{ m}$  and  $17 \text{ m NaClO}_4$  over 2500 cycles at  $20 \text{ A g}^{-1}$  CE: Pt wire, RE: Ag/AgCl/3 M KCl.

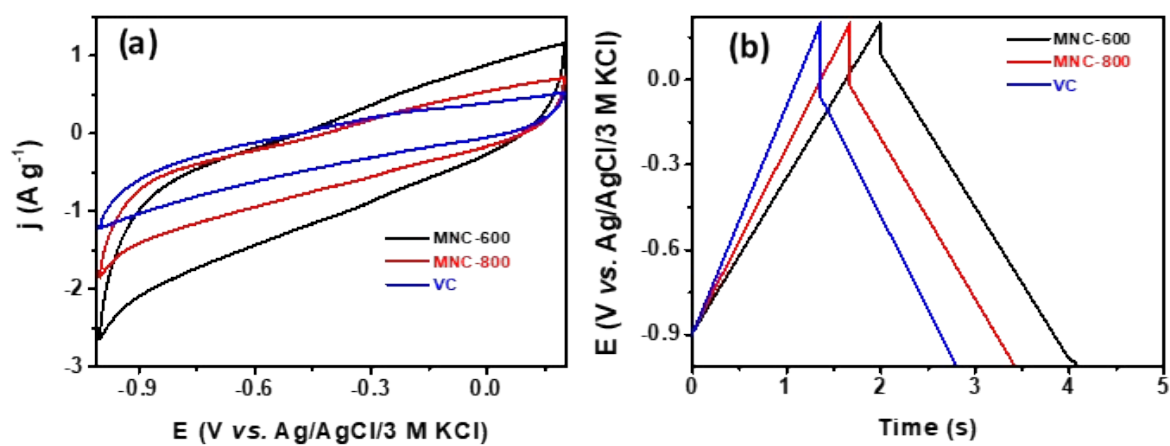

**Fig. S22.** (a) CVs at a scan rate of  $30 \text{ mV s}^{-1}$ , and (b) corresponding GCD curves of various catalysts at  $10 \text{ A g}^{-1}$  in  $17 \text{ m NaClO}_4$  CE: Pt wire, RE: Ag/AgCl/3 M KCl.

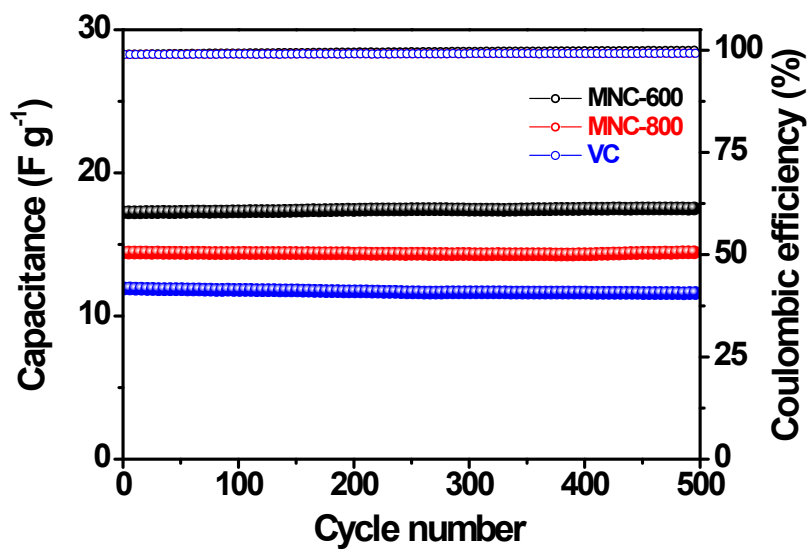

**Fig. S23.** Cycling stability of MNC-600, MNC-800, and VC up to 500 cycles at 10 A g<sup>-1</sup> in 17 m NaClO<sub>4</sub>. CE: Pt wire, RE: Ag/AgCl/3 M KCl.

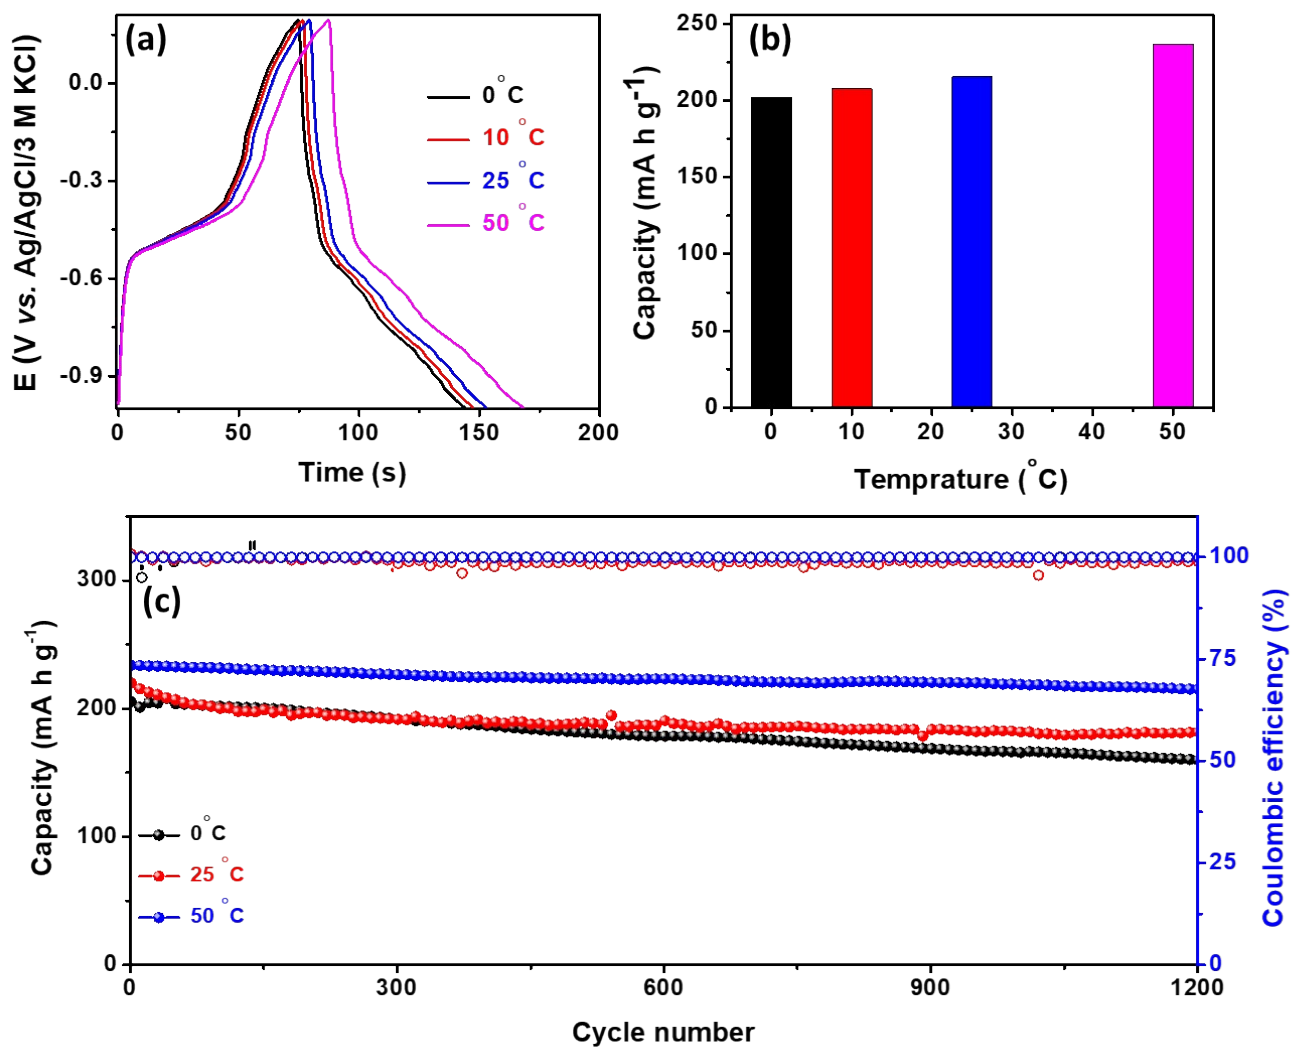

**Fig. S24** (a) Charge discharge curves, (b) corresponding capacity for S@MNC-600 at various temperatures at  $10 \text{ A g}^{-1}$ , and (c) cycling stability of S@MNC-600 up to 1200 cycles at  $20 \text{ A g}^{-1}$  in  $17 \text{ m NaClO}_4$ .

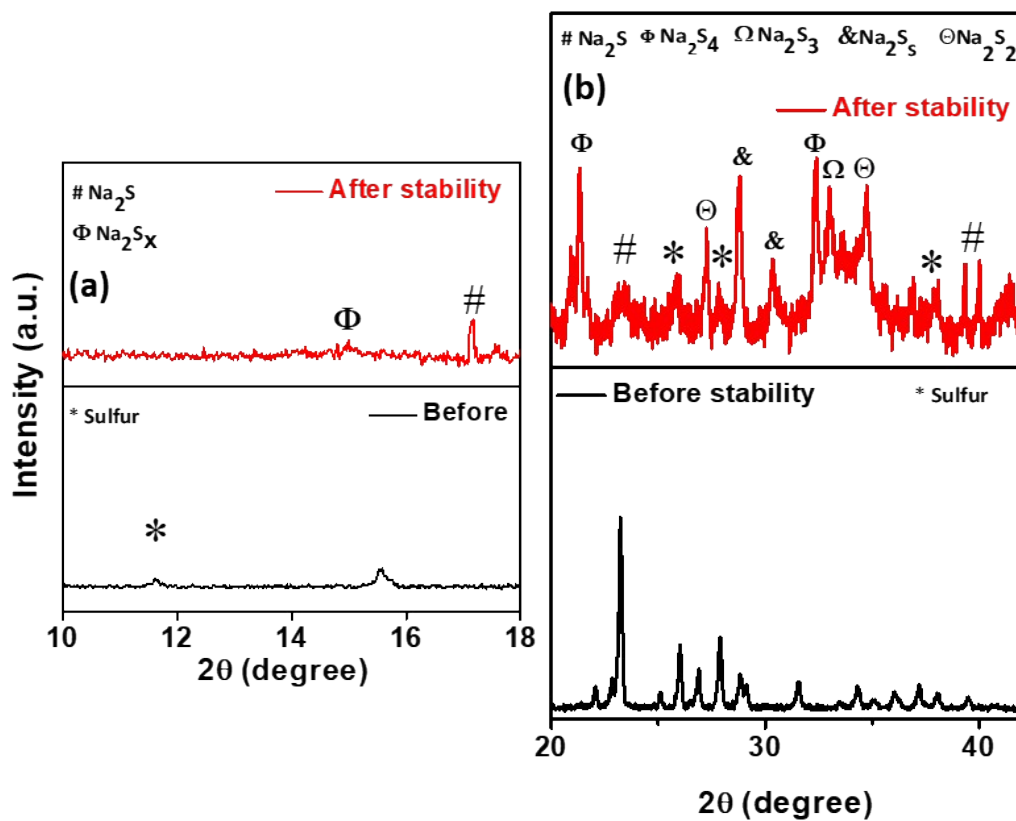

Fig. S25 XRD pattern of S@MNC-600 before and after the stability study in 17 m NaClO<sub>4</sub>.

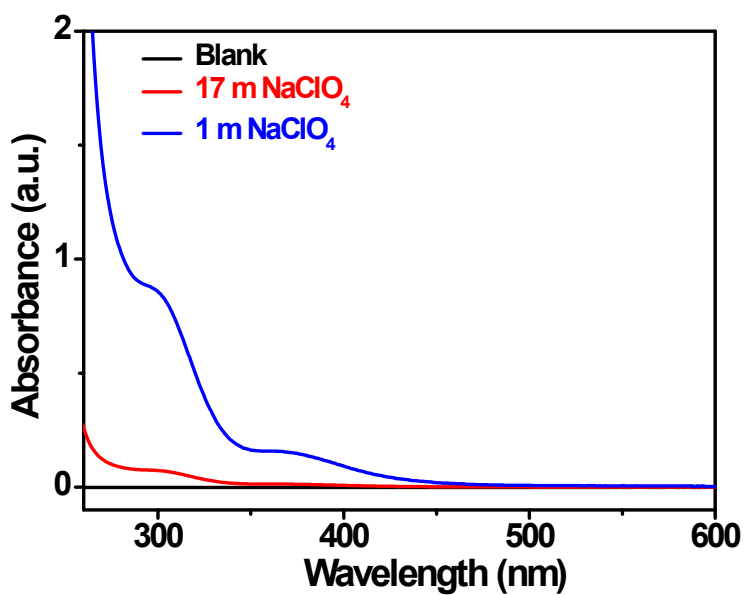

Fig. S26 UV-vis spectra of the various electrolyte after the stability studies.

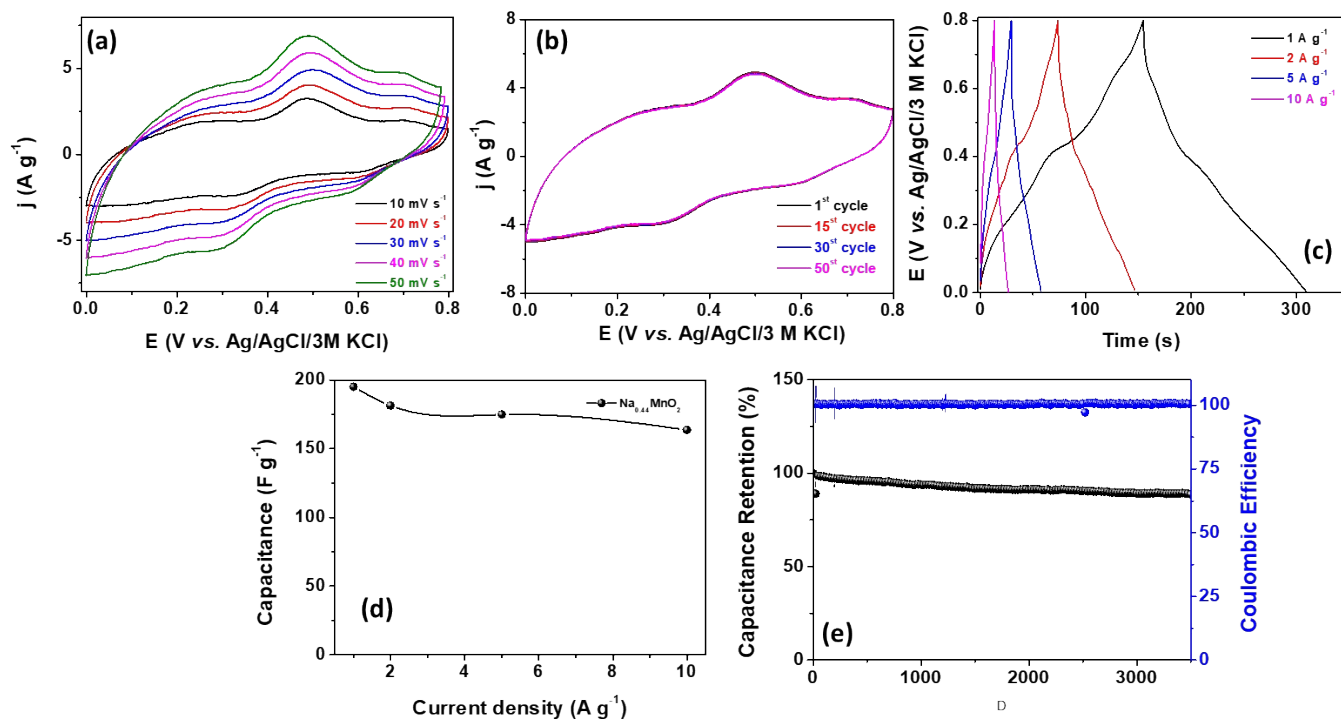

**Fig. S27.** (a) CVs of  $\text{Na}_{0.44}\text{MnO}_2$  at various scan rates, (b) cycling stability at  $30 \text{ mV s}^{-1}$  (c) GCD curve of  $\text{Na}_{0.44}\text{MnO}_2$  at various current densities, (d) corresponding capacitance vs. current density (e) capacitance retention up to 3500 cycles in 17 m  $\text{NaClO}_4$  CE: Pt wire, RE: Ag/AgCl/3 M KCl.

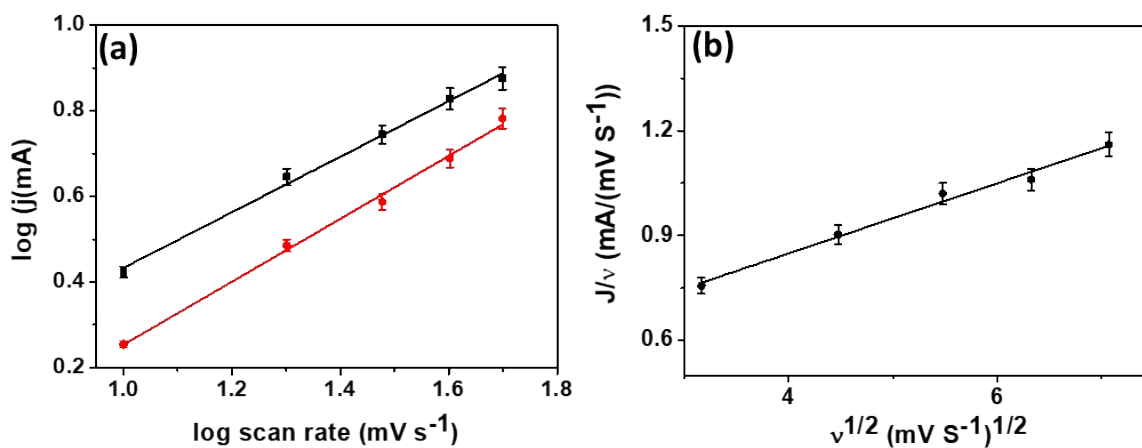

**Fig. S28.** (a) The logarithm plot of current density against logarithmic of scan rate to analyse b value, (b) plot of current per unit scan rate against the square root of scan rate in 17 m  $\text{NaClO}_4$  CE: Pt wire, RE: Ag/AgCl/3 M KCl.



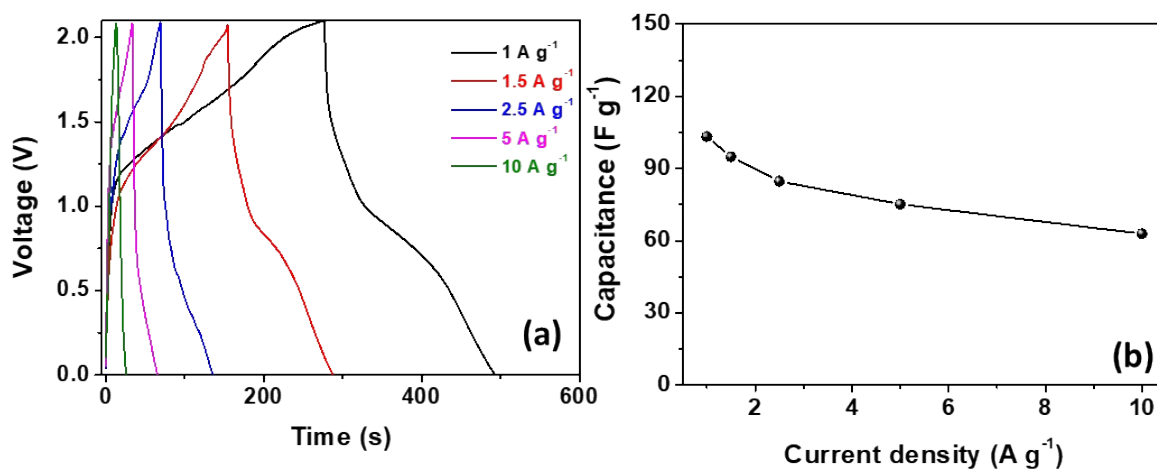

**Fig. S29.** GCD curves and, (b) capacitance for S@VC||Na<sub>0.44</sub>MnO<sub>2</sub> in 17 m NaClO<sub>4</sub> at various scan current density.

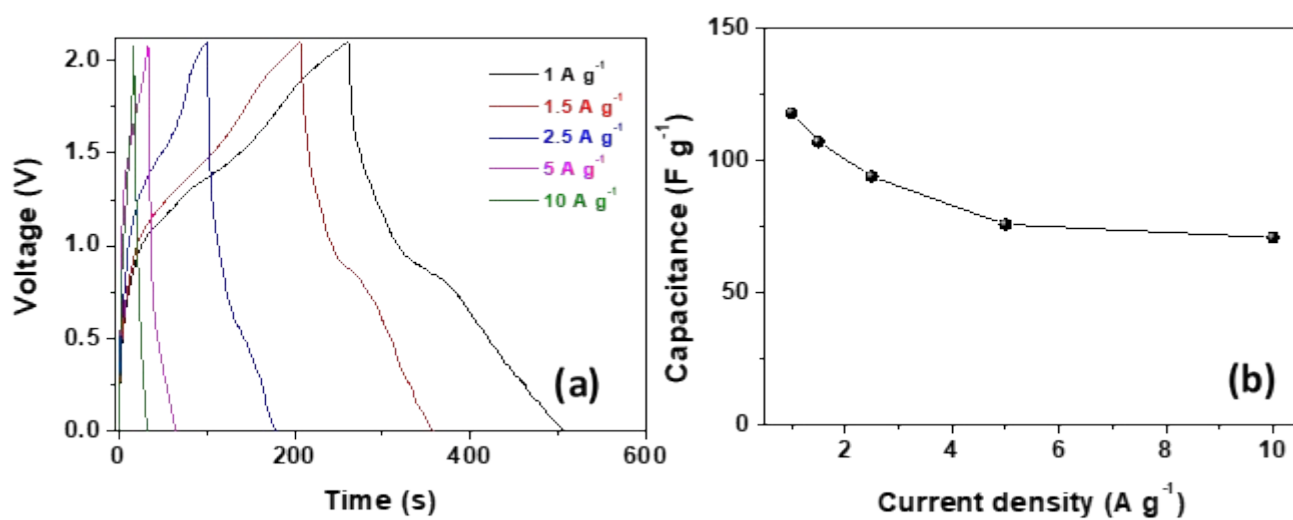

**Fig. S30.** GCD curves and, (b) capacitance for S@MNC-800||Na<sub>0.44</sub>MnO<sub>2</sub> in 17 m NaClO<sub>4</sub> at various scan current density.

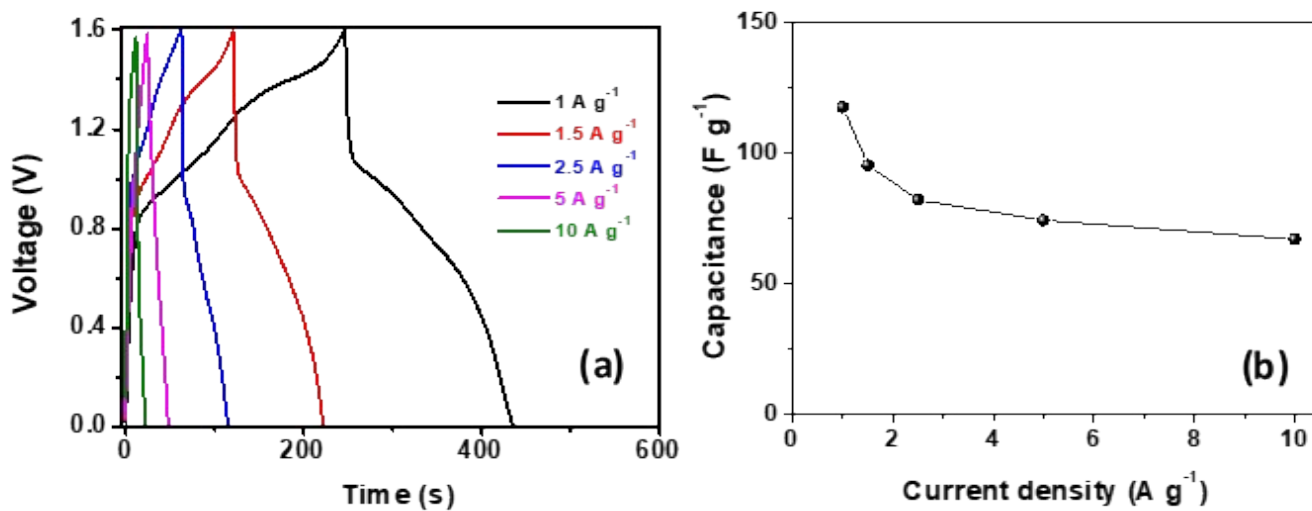

**Fig. S31.** (a) GCD curves of S@MNC-600||Na<sub>0.44</sub>MnO<sub>2</sub> in 1 m NaClO<sub>4</sub> at various current densities, (b) are the corresponding capacitance vs. current density plot.

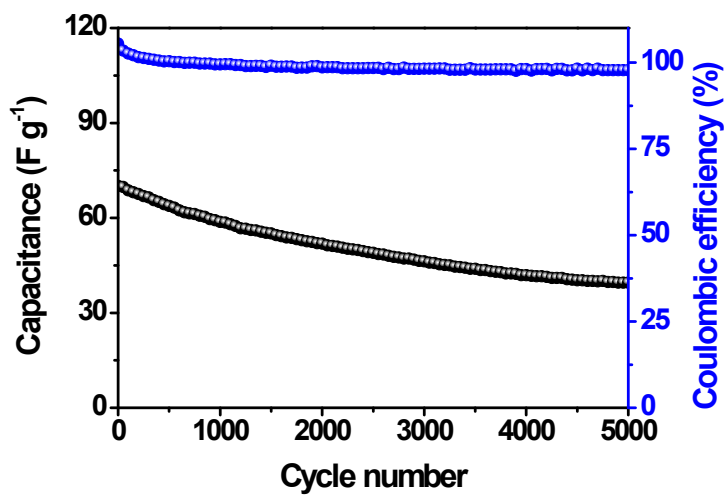

**Fig. S32.** cycling stability of S@MNC-600||Na<sub>0.44</sub>MnO<sub>2</sub> in 1 m NaClO<sub>4</sub> up to 5000 cycles at 10 A g<sup>-1</sup>.

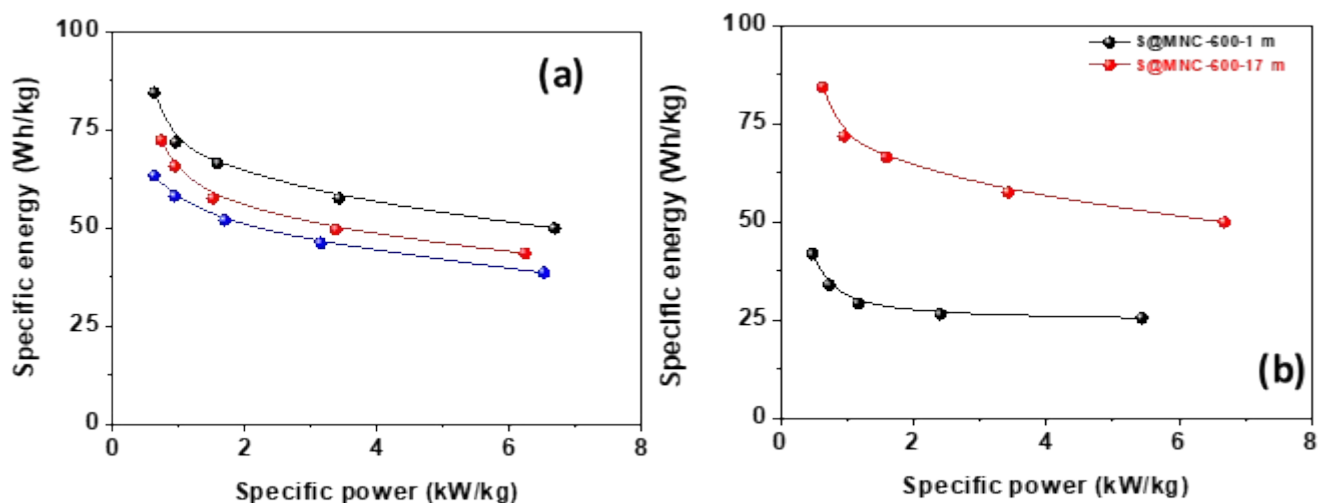

**Fig. S33.** Ragone plot showing energy density and power density of S@MNC-600||Na<sub>0.44</sub>MnO<sub>2</sub> (black), S@MNC-800||Na<sub>0.44</sub>MnO<sub>2</sub> (red), and S@VC||Na<sub>0.44</sub>MnO<sub>2</sub> (blue), in (a) 17 m NaClO<sub>4</sub>, (b) Ragone plot showing the comparison S@MNC-600||Na<sub>0.44</sub>MnO<sub>2</sub> full cell in 17 m and 1 m NaClO<sub>4</sub>.

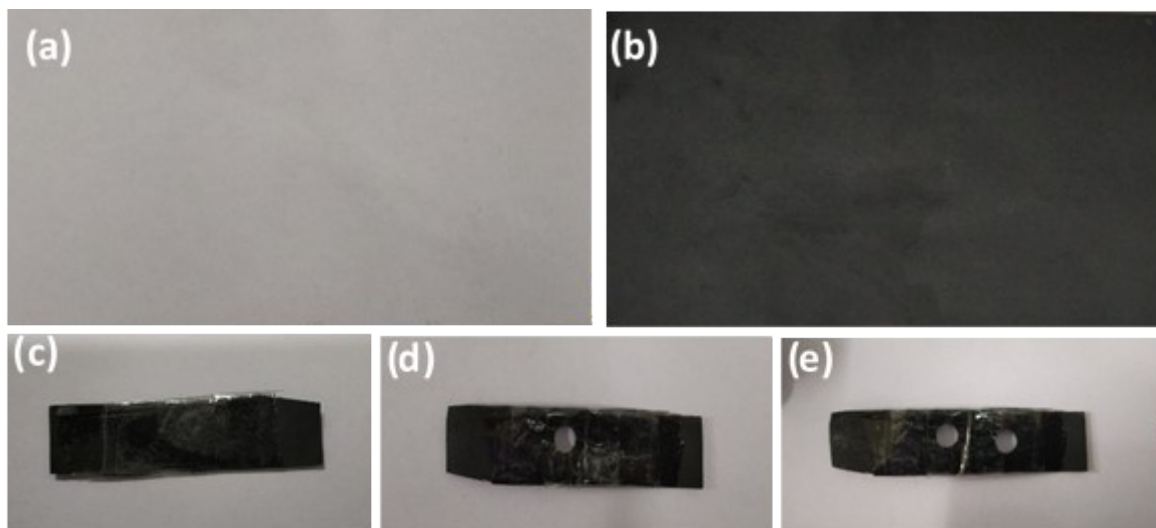

**Fig. S34.** Images of A4 size paper (a) before and (b) after carbon coating, (c) assembled hybrid Na-S full cell in (c) original state, (d) after punching a hole, and (e) after punching two holes.

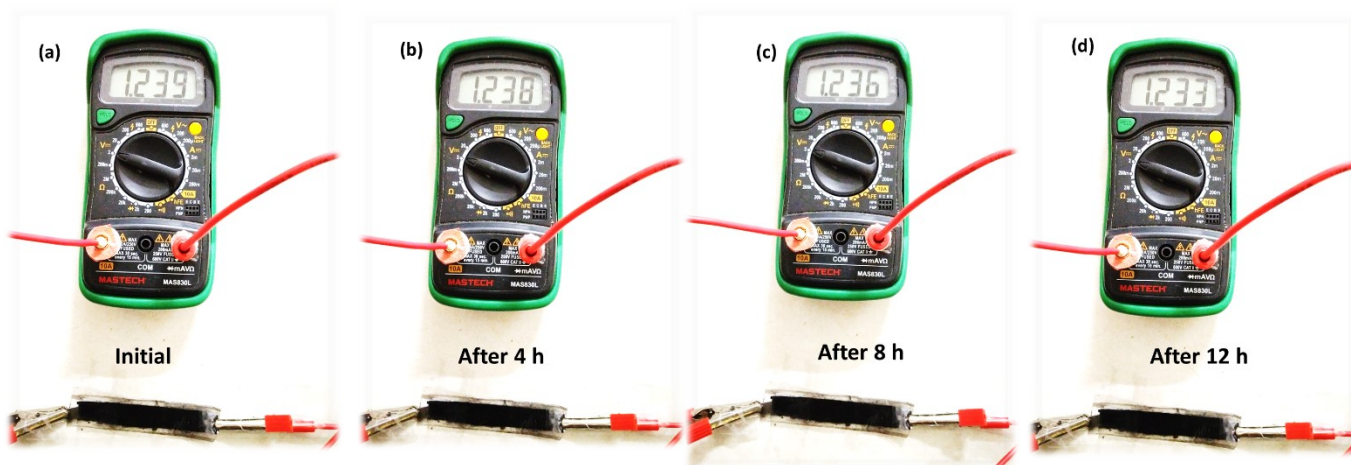

**Fig. S35.** Monitoring of OCP of a flexible paper-based Na-S hybrid full cell (a) initially, after (b) 4 h, (c) 8 h and 12 h.

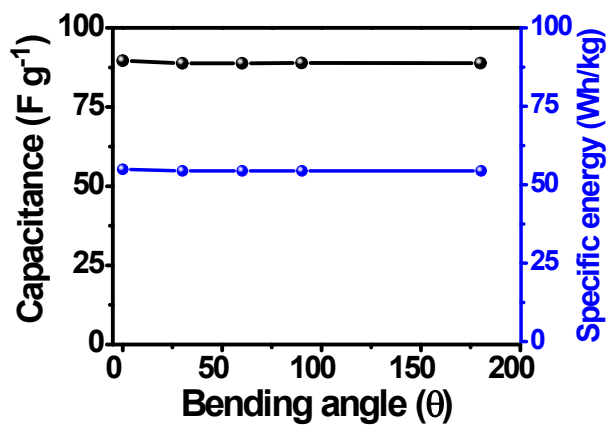

**Fig. S36.** Ragone plot showing energy and power density of S@MNC-600||Na<sub>0.44</sub>MnO<sub>2</sub> in 17 m NaClO<sub>4</sub> at various deformations.

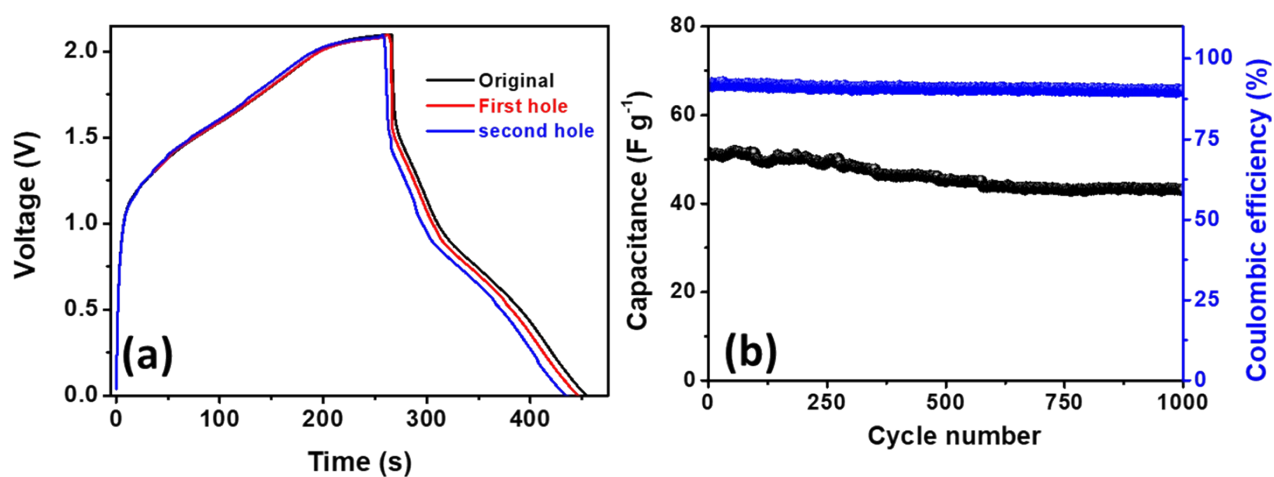

**Fig. S37.** (a) GCD curves for paper-based S@MNC-600||Na<sub>0.44</sub>MnO<sub>2</sub> in 17 m NaClO<sub>4</sub> at various deformation state, (b) cycling stability at 8 A g<sup>-1</sup> paper-based battery bended at an angle of 60 °.

#### References:

1. M. H. Lee, S. J. Kim, D. Chang, J. Kim, S. Moon, K. Oh, K.-Y. Park, W. M. Seong, H. Park and G. Kwon, *Mater. Today*, 2019, **29**, 26-36.
